# Supplementary material for: One-step growth of nitrogen-decorated iron–nickel sulfide nanosheets for the oxygen evolution reaction
Source: Royal Society of Chemistry journal article supplement (doi:10.1039/c8ta00536b), 2018-01-01
Supplement: c8ta00536b1.pdf [file c8ta00536b1.pdf]

## Supporting Information

# One-step growth of nitrogen-decorated iron-nickel sulfide nanosheets for oxygen evolution reaction

*Yanshuo Jin<sup>1</sup>, Xin Yue<sup>1</sup>, Hongyu Du<sup>1</sup>, Kai Wang<sup>1</sup>, Shangli Huang<sup>2</sup>, Pei Kang Shen<sup>\*1,2</sup>*

<sup>1</sup> State Key Laboratory of Optoelectronic Materials and Technologies, School of Materials Science and Engineering, Sun Yat-sen University, Guangzhou 510275, P. R. China.

<sup>2</sup> Collaborative Innovation Center of Sustainable Energy Materials, Guangxi Key Laboratory of Electrochemical Energy Materials, State Key Laboratory of Processing for Non-ferrous Metal and Featured Materials, Guangxi University, Nanning 530004, P. R. China

### AUTHOR INFORMATION

#### Corresponding Author

\*[pkshen@gxu.edu.cn](mailto:pkshen@gxu.edu.cn); [stssp@mail.sysu.edu.cn](mailto:stssp@mail.sysu.edu.cn)

## Experimental Section

*Materials:* Thiourea ( $\text{CS}(\text{NH}_2)_2$ , AR) and urea ( $\text{CO}(\text{NH}_2)_2$ , AR) were purchased from Tianjin Damao Chemical Reagent Factory. Sulfur (S, AR) was purchased from Aladdin Chemical Reagent Factory. Ni foams, NiFe alloy foams (Ni:85%; Fe:15%) and NiFe alloy foams (Ni:50%; Fe:50%) were purchased from Kunshan Jiayisheng Electronics Co., Ltd. Hydrochloric acid (HCl solution, 36-38%, AR) and potassium hydroxide (KOH, AR) were purchased from Guangzhou Chemical Reagent Factory. The deionized water was purified by the RO-DI system.

*Synthesis of  $\text{N}-(\text{Ni,Fe})_3\text{S}_2/\text{NIF}$ :* 1 mmol thiourea was transferred into a corundum boat (60 mm×30 mm×15 mm). A piece of NiFe alloy foam (5.0 mm×2.0 mm×1.0 mm) after being cleaned by dilute HCl solution and deionized water was also transferred into the corundum boat. Then the corundum boat was transferred into a tube furnace. Annealing temperature is 300 °C for 1 hour. When cooled down to room temperature,  $\text{N}-(\text{Ni,Fe})_3\text{S}_2/\text{NIF}$  was taken out.

*Synthesis of  $\text{N-Ni}_3\text{S}_2/\text{NF}$ :* 1 mmol thiourea was transferred into a corundum boat (60 mm×30 mm×15 mm). A piece of Ni foam (5.0 mm×2.0 mm×1.0 mm) after being cleaned by dilute HCl solution and deionized water was also transferred into the corundum boat. Then the corundum boat was transferred into a tube furnace. Annealing temperature is 300 °C for 1 hour. When cooled down to room temperature,  $\text{N-Ni}_3\text{S}_2/\text{NF}$  was taken out.

*Synthesis of  $\text{H:N}-(\text{Ni,Fe})_3\text{S}_2/\text{NIF}$ :* 1 mmol sulfur and 1 mmol urea were transferred into a corundum boat (60 mm×30 mm×15 mm). A piece of NiFe alloy foam (5.0 mm×2.0 mm×1.0 mm) after being cleaned by dilute HCl solution and deionized water was also transferred into the corundum boat. Then the corundum boat was transferred into a tube furnace. Annealing temperature is 450 °C for 1 hour. When cooled down to room temperature,  $\text{H:N}-(\text{Ni,Fe})_3\text{S}_2/\text{NIF}$  was taken out.

*Synthesis of  $\text{N}-(\text{Ni,Fe})\text{S}/\text{NIF}$ :* 1 mmol sulfur and 1 mmol urea were transferred into a corundum boat (60 mm×30 mm×15 mm). A piece of NiFe alloy foam (5.0 mm×2.0 mm×1.0 mm) after being cleaned by dilute HCl solution and deionized water was also transferred into the corundum boat. Then the corundum boat was transferred into a tube furnace. Annealing temperature is 300°C for 1 hour. When cooled down to room temperature,  $\text{N}-(\text{Ni,Fe})\text{S}/\text{NIF}$  was taken out.

*Synthesis of  $\alpha\text{-NiFeS}/\text{NIF}$ :* 1 mmol sulfur was transferred into a corundum boat (60 mm×30 mm×15 mm). A piece of NiFe alloy foam (5.0 mm×2.0 mm×1.0 mm) after being cleaned by dilute HCl solution and deionized water was also transferred into the corundum boat. Then the corundum boat was transferred into a tube furnace. Annealing temperature is 300°C for 1 hour. When cooled down to room temperature,  $\alpha\text{-NiFeS}/\text{NIF}$  was taken out.

*Synthesis of  $\text{N}-(\text{Ni,Fe})_9\text{S}_8/\text{NIF}$ :* 1 mmol thiourea was transferred into a corundum boat (60 mm×30 mm×15 mm). A piece of NiFe alloy foam (5.0 mm×2.0 mm×1.0 mm, Ni:50%; Fe:50%) after being cleaned by dilute HCl solution and deionized water was also transferred into the corundum boat. Then the corundum boat was transferred into a tube furnace. Annealing temperature is 300 °C

for 1 hour. When cooled down to room temperature, N-(Ni,Fe)<sub>3</sub>S<sub>2</sub>/NIF was took out.

*Characterizations:* TG-IR data were acquired on a TG-209/Vector™-22 combined instrument. SEM measurements were taken on a Quanta 400/INCA/HKL scanning electron microscope. XRD data were obtained on a D-MAX 2200 VPC diffractometer with Cu K $\alpha$  radiation ( $\lambda=1.54056\text{\AA}$ ). TEM measurements were acquired on a JEM-2010HR electron microscopy. XPS measurements were carried out on an ESCALAB 250 spectroscopy.

*Electrochemical measurements:* Electrochemical measurements were tested on a Bio-logic VMP3 electrochemical analyzer. The OER electrochemical measurements were performed in a typical three-electrode device. The counter electrode is a graphite rod and the reference electrode is a reversible hydrogen electrode (RHE). Polarization curves at a scan rate of  $1\text{ mV s}^{-1}$  were measured in O<sub>2</sub>-saturated 1 M KOH solution at 25 °C. The chronopotentiometric was used to test stability and the OER potential at a constant current density of  $10\text{ mA cm}^{-2}$ . All of the potentials are iR-corrected.

**Table S1.** Comparisons of OER performance for various non-precious electrocatalysts in alkaline solution ( $\eta_{10}$ : overpotential at the current density of 10 mA cm<sup>-2</sup>).

| Catalysts                                                | $\eta_{10}$ (mV) | Electrolyte    | Ref.                                   |
|----------------------------------------------------------|------------------|----------------|----------------------------------------|
| <b>N-(Ni,Fe)<sub>3</sub>S<sub>2</sub>/NIF</b>            | <b>167</b>       | <b>1 M KOH</b> | <b>This work</b>                       |
| FeCoW oxyhydroxides                                      | 191              | 1 M KOH        | Science 2016 , 352, 333.               |
| W <sub>0.5</sub> Co <sub>0.4</sub> Fe <sub>0.1</sub> /NF | 250              | 1 M KOH        | Angew. Chem. Int. Ed. 2017, 129, 4573. |
| FeCo/Co <sub>4</sub> N                                   | 280              | 1 M KOH        | Adv. Mater. 2017, 29, 1704091.         |
| porous MoO <sub>2</sub>                                  | 260              | 1 M KOH        | Adv. Mater. 2016, 28, 3785.            |
| FeNiP-NP                                                 | 180              | 1 M KOH        | Adv. Mater. 2017, 29, 1704075.         |
| NiSe <sub>2</sub> nanosheets                             | 330              | 1 M KOH        | Adv. Mater. 2017, 29, 1701687.         |
| Mn@Co <sub>x</sub> Mn <sub>3-x</sub> O <sub>4</sub>      | 246              | 1 M KOH        | Adv. Mater. 2017, 29, 1701820.         |
| Fe-Ni <sub>3</sub> S <sub>2</sub> /FeNi                  | 282              | 1 M KOH        | Small, 2017, 13, 1604161.              |
| NiS                                                      | 320              | 1 M KOH        | ACS Energy Lett. 2016, 1, 195.         |

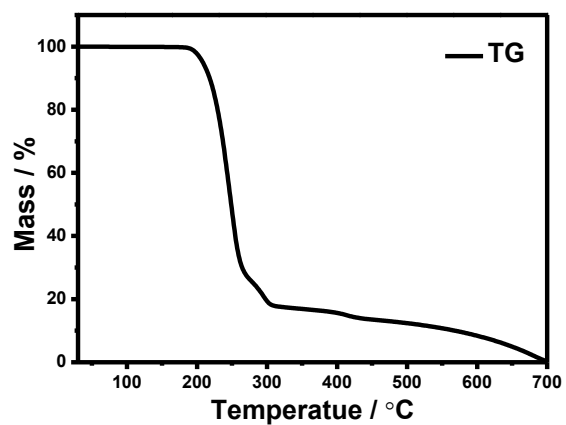

Figure S1. TG curve of thiourea during the annealing process in a nitrogen atmosphere.

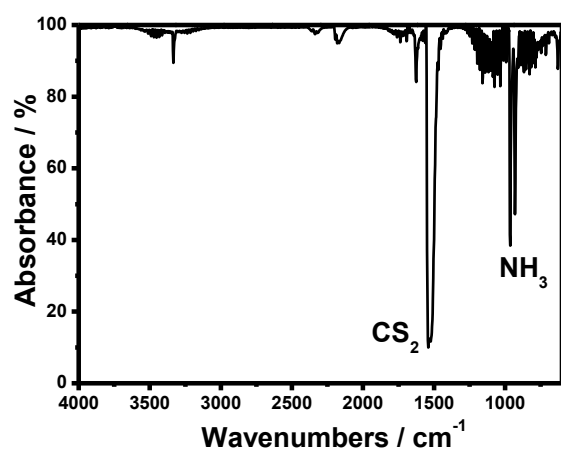

Figure S2. IR curve of decomposition products of thiourea in a nitrogen atmosphere.

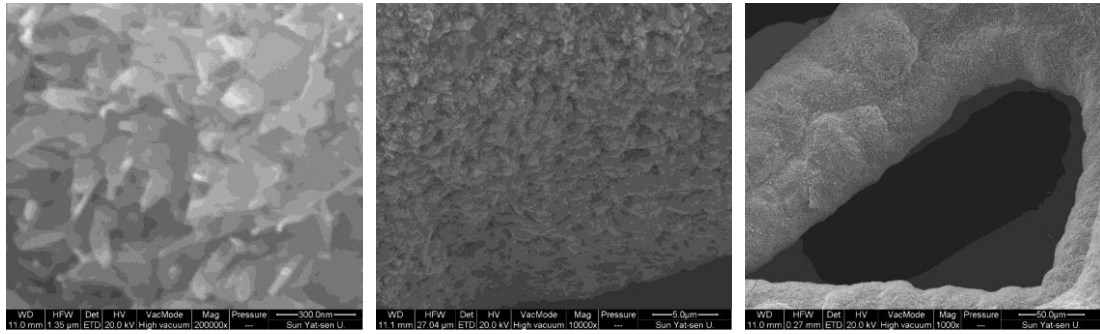

Figure S3. SEM images of N-(Ni,Fe)<sub>3</sub>S<sub>2</sub>/NIF.

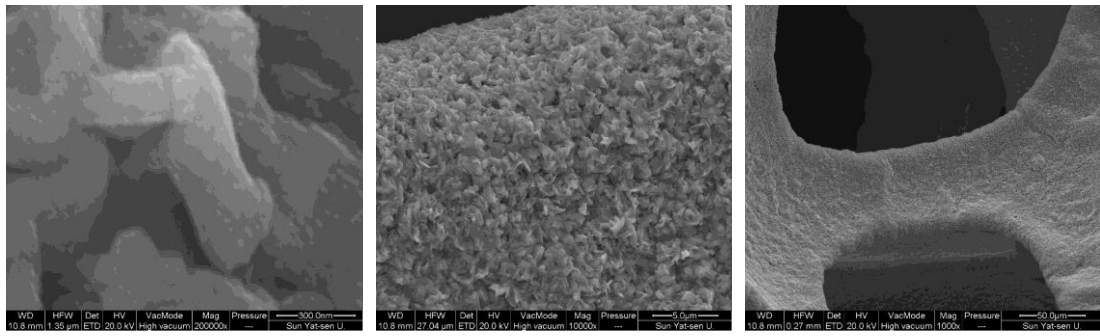

Figure S4. SEM images of N-Ni<sub>3</sub>S<sub>2</sub>/NF

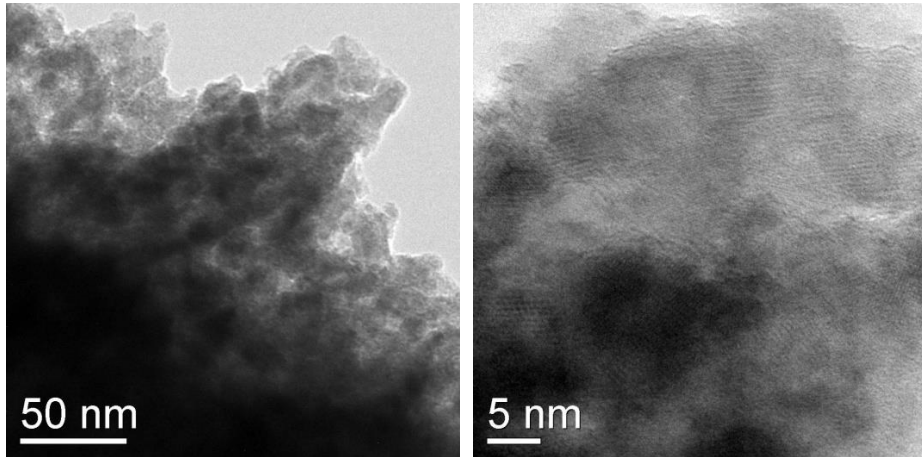

**Figure S5.** TEM images of N-(Ni,Fe)<sub>3</sub>S<sub>2</sub>.

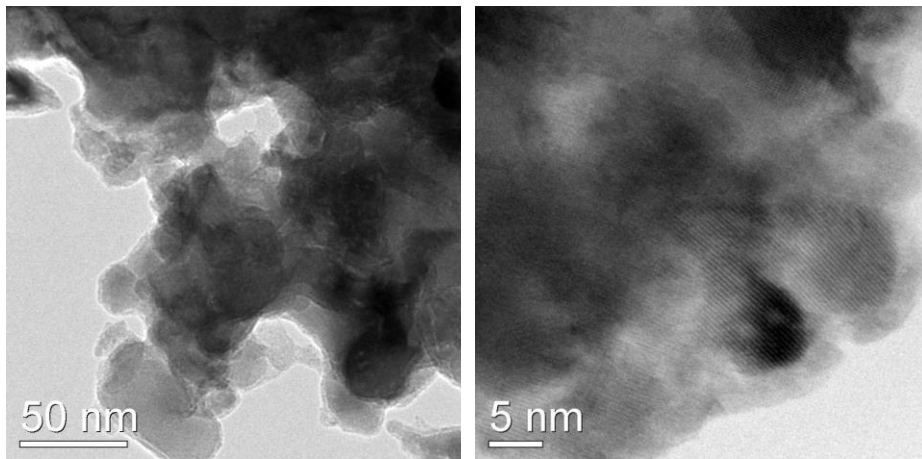

**Figure S6.** TEM images of N-Ni<sub>3</sub>S<sub>2</sub>.

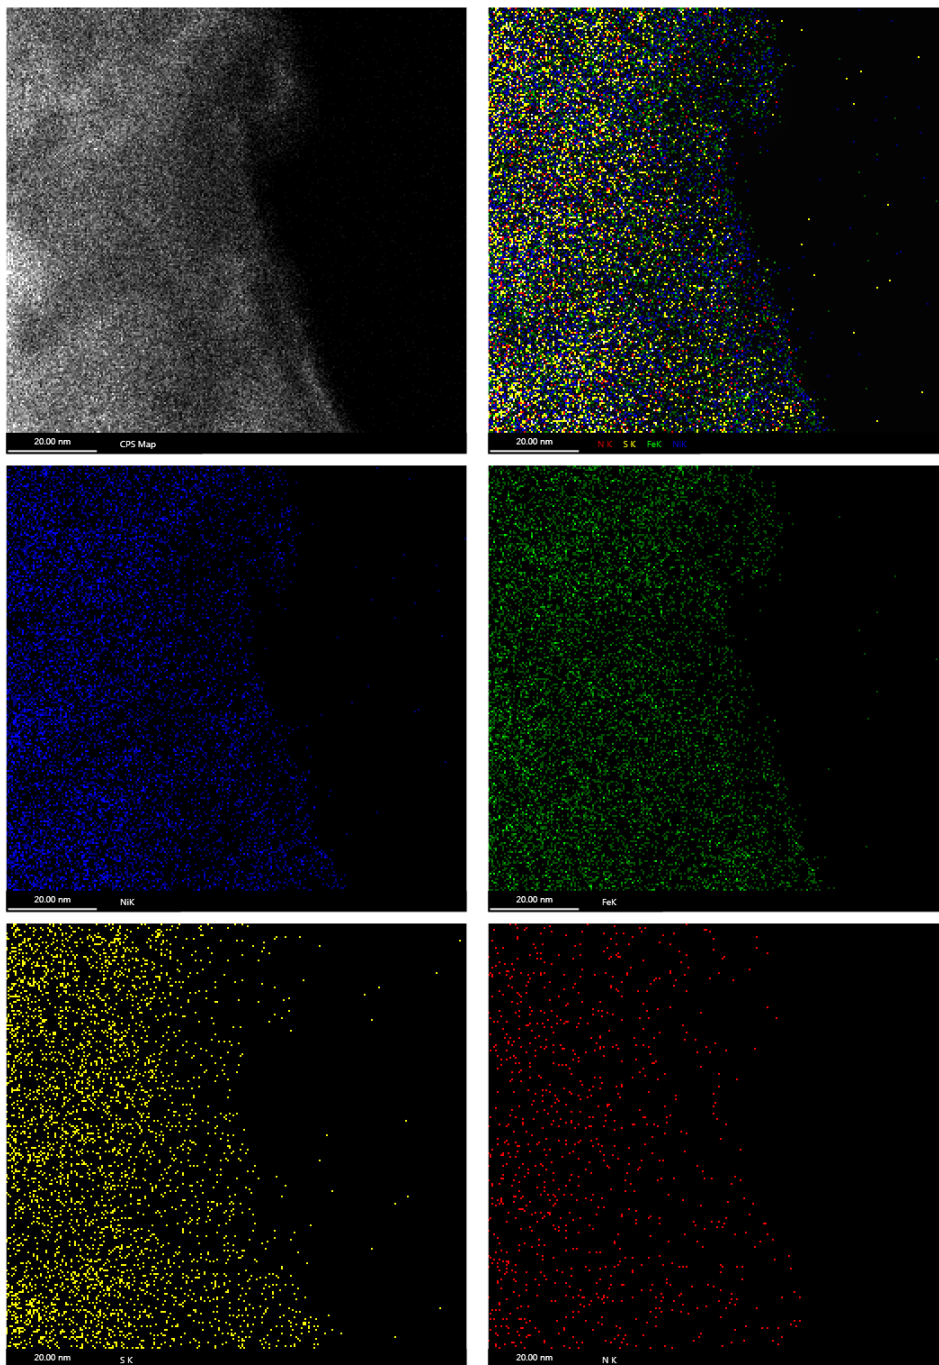

**Figure S7.** EDX elemental mapping images of N-(Ni,Fe)<sub>3</sub>S<sub>2</sub>.



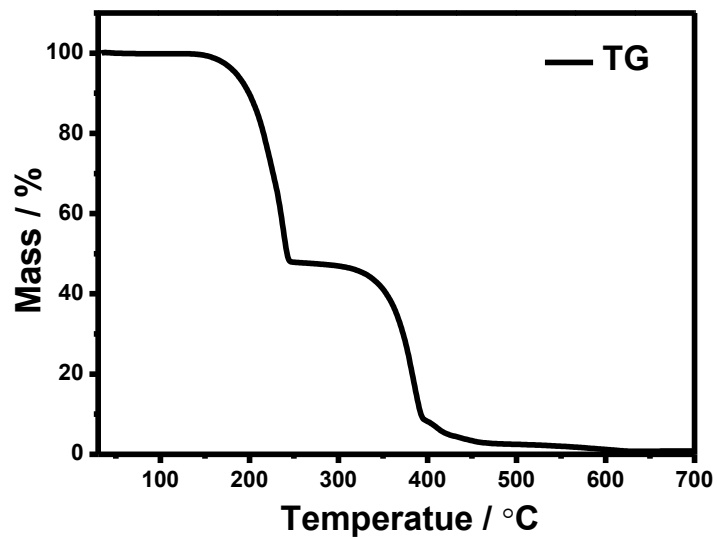

Figure S8. TG curve of urea during the annealing process in a nitrogen atmosphere.

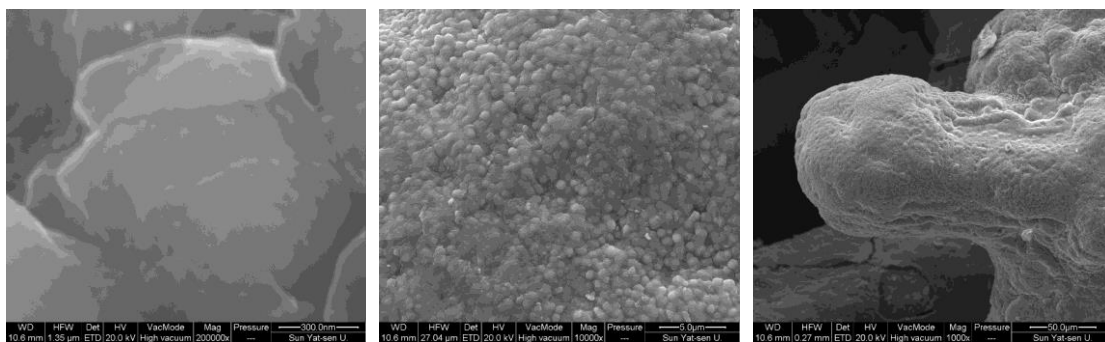

Figure S9. SEM images of H:N-(Ni,Fe)<sub>3</sub>S<sub>2</sub>/NIF.

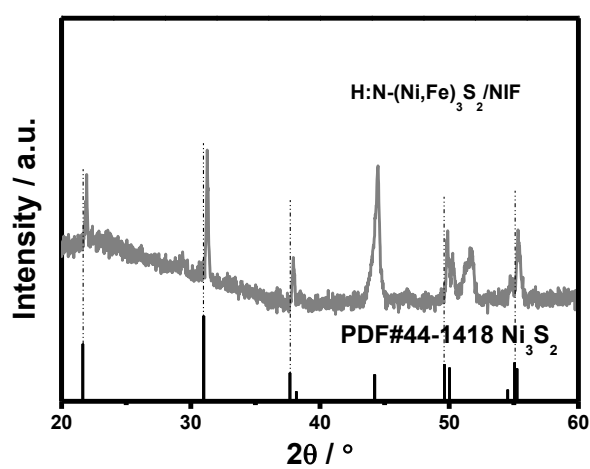

Figure S10. XRD pattern of H:N-(Ni,Fe)<sub>3</sub>S<sub>2</sub>/NIF.

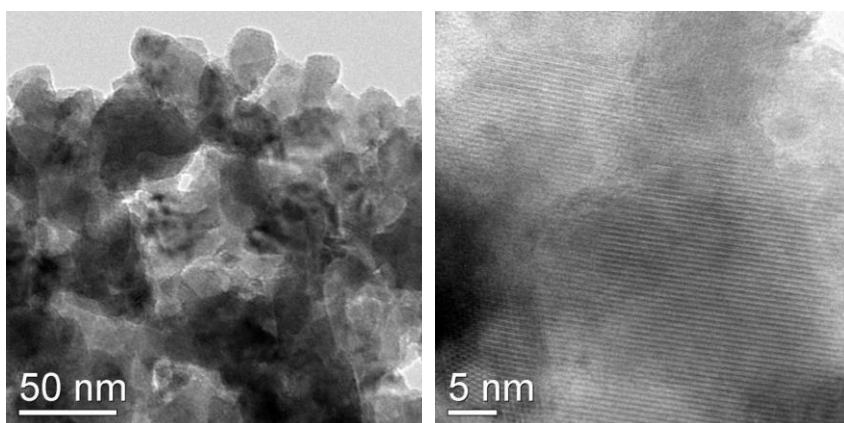

Figure S11. TEM images of H:N-(Ni,Fe)<sub>3</sub>S<sub>2</sub>.

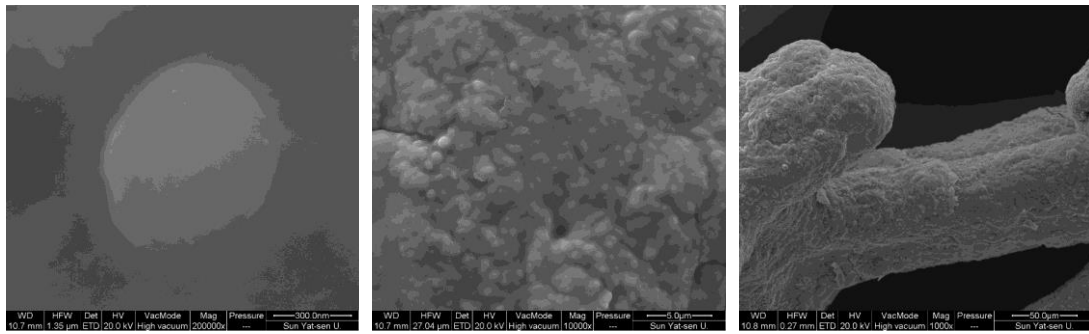

Figure S12. SEM images of N-(Ni,Fe)S/NIF.

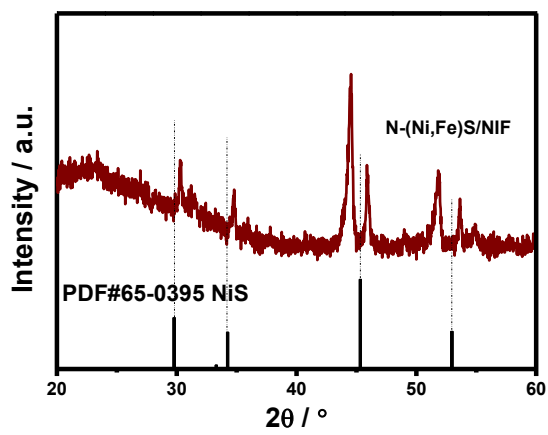

Figure S13. XRD pattern of N-(Ni,Fe)S/NIF.

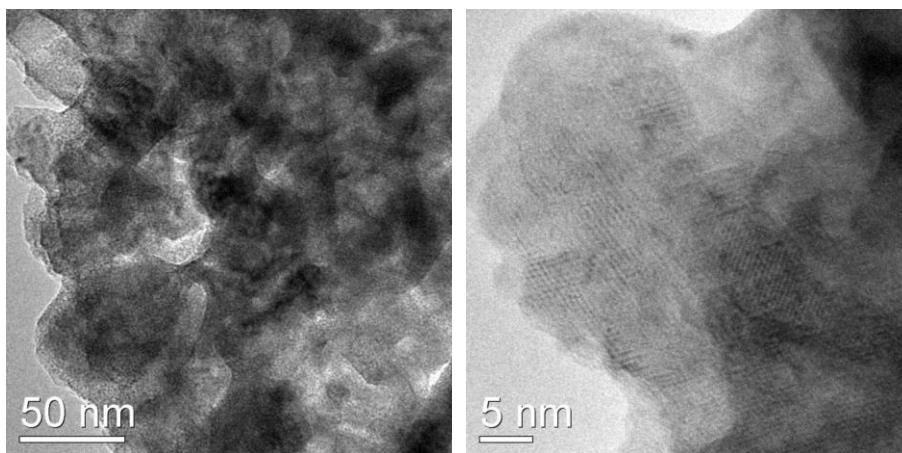

Figure S14. TEM images of N-(Ni,Fe)S.

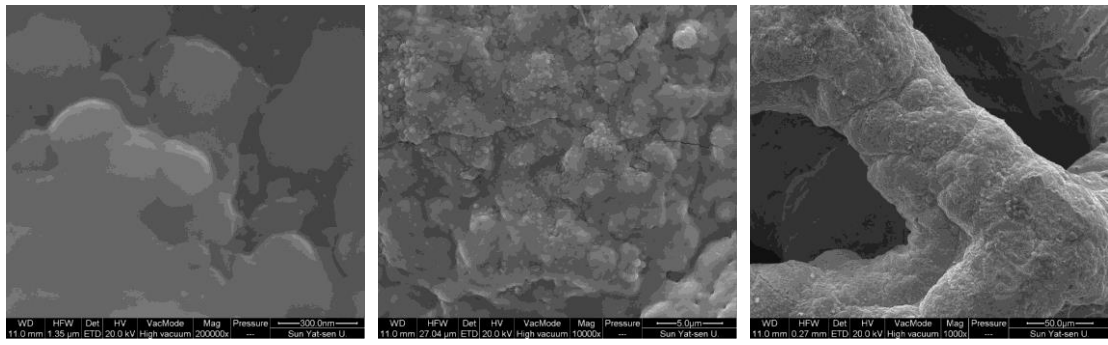

Figure S15. SEM images of  $\alpha$ -NiFeS/NIF.

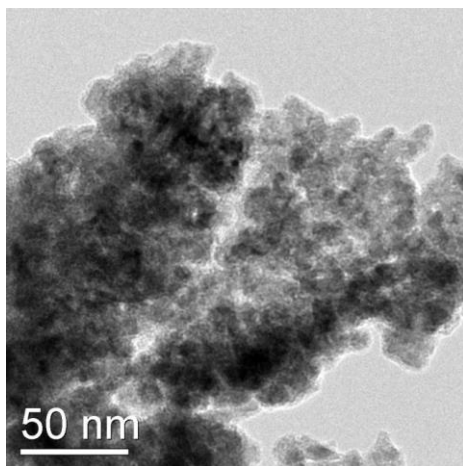

Figure S16. TEM images of  $\alpha$ -NiFeS.

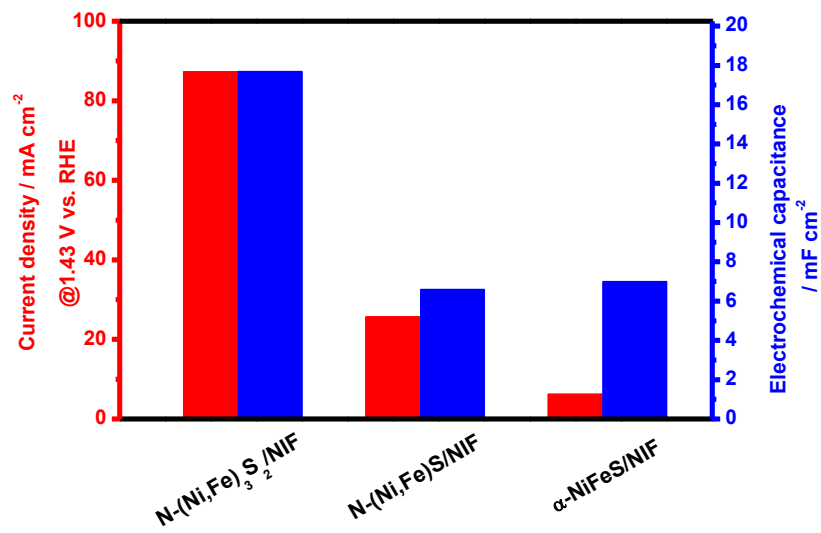

**Figure S17.** Current density @ 1.43 V vs. RHE and Electrochemical capacitance of N-(Ni,Fe)<sub>3</sub>S<sub>2</sub>/NIF, N-(Ni,Fe)S/NIF and α-NiFeS/NIF.

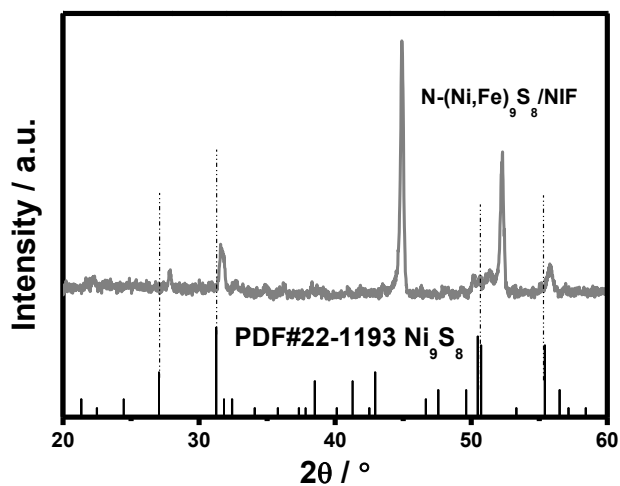

Figure S18. XRD patterns of N-(Ni,Fe)<sub>9</sub>S<sub>8</sub>/NIF(Fe:50%).

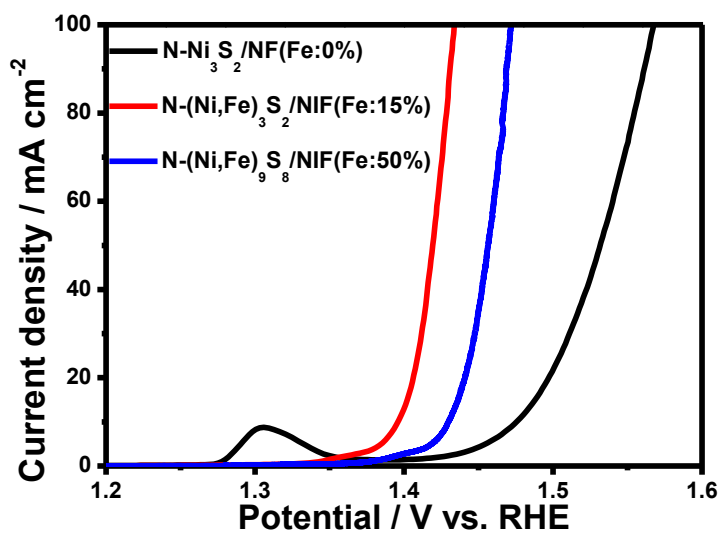

Figure S19. Polarization curves with iR-corrected of N-Ni<sub>3</sub>S<sub>2</sub>/NF, N-(Ni,Fe)<sub>3</sub>S<sub>2</sub>/NIF(Fe:15%) and N-(Ni,Fe)<sub>9</sub>S<sub>8</sub>/NIF(Fe:50%) in 1M KOH solution at a scan rate of 1 mV s<sup>-1</sup> and 25 °C.

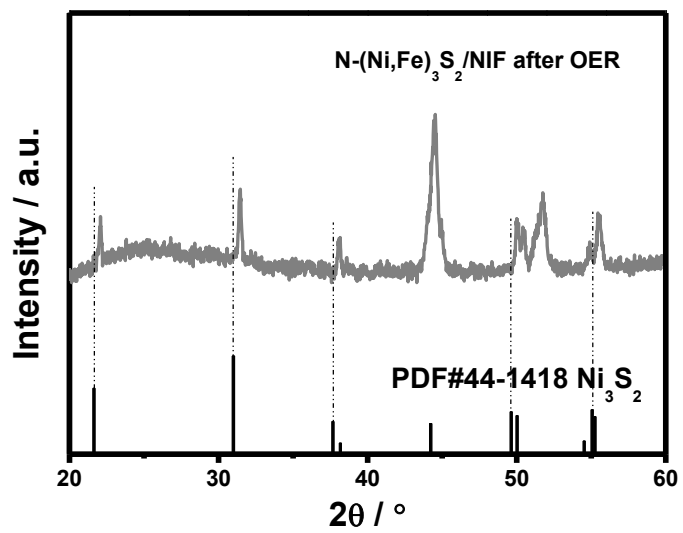

Figure S20. XRD pattern of N-(Ni,Fe)<sub>3</sub>S<sub>2</sub>/NIF after OER.

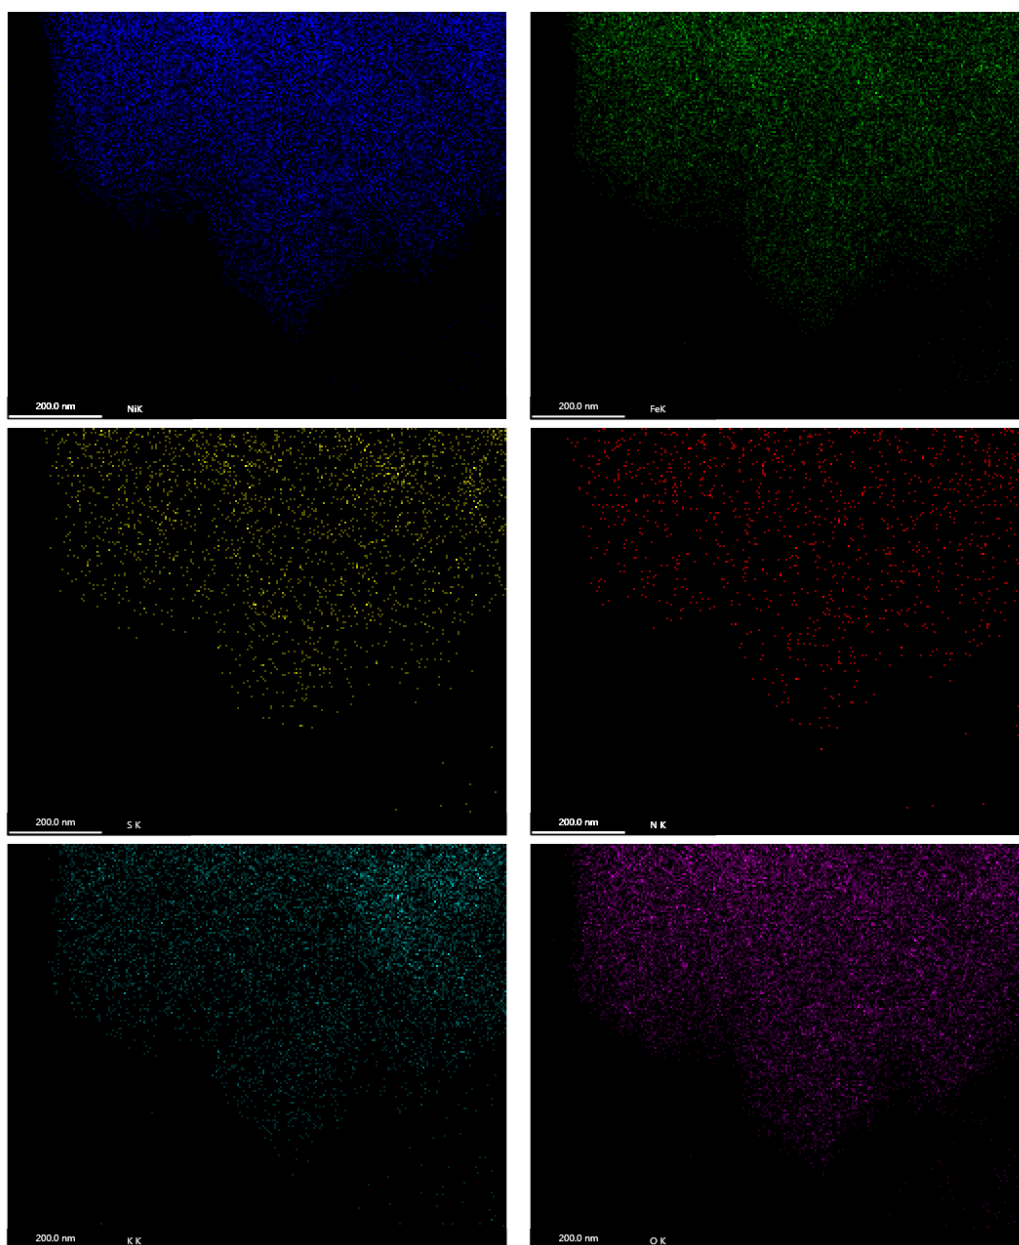

**Figure S21.** EDX elemental mapping images of N-(Ni,Fe)<sub>3</sub>S<sub>2</sub> after OER.
